# Supplementary material
Source: PubMed Central journal article supplement (PMC8209266)
Supplement: mmc1.pdf [file mmc1.pdf]

**Supplemental information**

**SARS-CoV-2 seroprevalence in the urban  
population of Qatar: An analysis of antibody  
testing on a sample of 112,941 individuals**

**Peter V. Coyle, Hiam Chemaitelly, Mohamed Ali Ben Hadj Kacem, Naema Hassan Abdulla Al Molawi, Reham Awni El Kahlout, Imtiaz Gilliani, Nourah Younes, Ghada Ali A.A. Al Anssari, Zaina Al Kanaani, Abdullatif Al Khal, Einas Al Kuwari, Adeel A. Butt, Andrew Jeremijenko, Anvar Hassan Kaleeckal, Ali Nizar Latif, Riyazuddin Mohammad Shaik, Hanan F. Abdul Rahim, Gheyath K. Nasrallah, Hadi M. Yassine, Mohamed Ghaith Al Kuwari, Hamad Eid Al Romaihi, Mohamed H. Al-Thani, Roberto Bertollini, and Laith J. Abu-Raddad**

## Supplemental information

**Table S1.** Demographic characteristics of the study sample and of the urban population of Qatar based on the Primary health Care Corporation database (Primary Health Care Corporation, 2020).

| <b>Demographic characteristics</b>   | <b>Study sample (%)</b> | <b>Urban population (%)</b> |
|--------------------------------------|-------------------------|-----------------------------|
| <b>Sex</b>                           |                         |                             |
| Women                                | 48.4                    | 48.0                        |
| Men                                  | 51.6                    | 52.0                        |
| <b>Age (years)</b>                   |                         |                             |
| <10                                  | 3.0                     | 21.5                        |
| 10-19                                | 4.9                     | 13.1                        |
| 20-29                                | 17.1                    | 15.7                        |
| 30-39                                | 28.0                    | 23.7                        |
| 40-49                                | 20.9                    | 14.5                        |
| 50-59                                | 14.5                    | 7.4                         |
| 60-69                                | 7.6                     | 2.9                         |
| 70-79                                | 2.8                     | 0.8                         |
| 80+                                  | 1.2                     | 0.3                         |
| <b>Nationality</b>                   |                         |                             |
| All other nationalities <sup>d</sup> | 22.0                    | 24.8                        |
| Bangladeshi                          | 6.9                     | 4.7                         |
| Nepalese                             | 4.4                     | 1.6                         |
| Pakistani                            | 4.5                     | 5.6                         |
| Indian                               | 16.5                    | 17.8                        |
| Sri Lankan                           | 2.0                     | 1.6                         |
| Filipino                             | 6.3                     | 8.2                         |
| Sudanese                             | 3.5                     | 3.6                         |
| Egyptian                             | 8.3                     | 10.1                        |
| Qatari                               | 25.8                    | 21.9                        |

**Table S2.** Results of regression analyses for the association with antibody positivity where antibody test date has been included as a categorical term.

| Characteristics                      | Tested        | Antibody positive   |         | Univariable regression analysis |         | F test               | Multivariable regression analysis |                      |
|--------------------------------------|---------------|---------------------|---------|---------------------------------|---------|----------------------|-----------------------------------|----------------------|
|                                      | N (%)         | N (% <sup>a</sup> ) | p-value | OR <sup>a</sup> (95% CI)        | p-value | p-value <sup>b</sup> | AOR <sup>a</sup> (95% CI)         | p-value <sup>c</sup> |
| Sex                                  |               |                     |         |                                 |         |                      |                                   |                      |
| Women                                | 54,707 (48.4) | 4,387 (8.0)         | <0.001  | 1.00                            |         |                      | 1.00                              |                      |
| Men                                  | 58,234 (51.6) | 14,457 (18.3)       |         | 2.59 (2.44-2.73)                | <0.001  | <0.001               | 2.08 (1.95-2.21)                  | <0.001               |
| Age (years)                          |               |                     |         |                                 |         |                      |                                   |                      |
| <10                                  | 3,384 (3.0)   | 243 (7.1)           | <0.001  | 1.00                            |         |                      | 1.00                              |                      |
| 10-19                                | 5,557 (4.9)   | 407 (7.3)           |         | 1.04 (0.87-1.25)                | 0.633   | <0.001               | 1.20 (1.00-1.45)                  | 0.056                |
| 20-29                                | 19,271 (17.1) | 2,867 (15.0)        |         | 2.33 (2.03-2.69)                | <0.001  |                      | 2.03 (1.75-2.35)                  | <0.001               |
| 30-39                                | 31,622 (28.0) | 5,533 (16.8)        |         | 2.67 (2.33-3.06)                | <0.001  |                      | 2.20 (1.90-2.54)                  | <0.001               |
| 40-49                                | 23,582 (20.9) | 4,876 (18.1)        |         | 2.91 (2.53-3.34)                | <0.001  |                      | 2.45 (2.13-2.83)                  | <0.001               |
| 50-59                                | 16,363 (14.5) | 3,220 (17.9)        |         | 2.87 (2.50-3.31)                | <0.001  |                      | 2.45 (2.12-2.83)                  | <0.001               |
| 60-69                                | 8,639 (7.6)   | 1,281 (15.0)        |         | 2.32 (2.00-2.69)                | <0.001  |                      | 2.10 (1.81-2.44)                  | <0.001               |
| 70-79                                | 3,192 (2.8)   | 315 (10.5)          |         | 1.54 (1.29-1.84)                | <0.001  |                      | 1.71 (1.43-2.06)                  | <0.001               |
| 80+                                  | 1,331 (1.2)   | 102 (7.5)           |         | 1.06 (0.83-1.36)                | 0.621   |                      | 1.40 (1.09-1.81)                  | 0.009                |
| Nationality                          |               |                     |         |                                 |         |                      |                                   |                      |
| All other nationalities <sup>d</sup> | 24,799 (22.0) | 2,203 (8.0)         | <0.001  | 1.00                            |         | <0.001               | 1.00                              |                      |
| Bangladeshi                          | 7,773 (6.9)   | 3,471 (41.9)        |         | 8.32 (7.66-9.04)                | <0.001  |                      | 5.02 (4.60-5.47)                  | <0.001               |
| Nepalese                             | 4,962 (4.4)   | 2,236 (38.2)        |         | 7.10 (6.43-7.85)                | <0.001  |                      | 4.23 (3.84-4.66)                  | <0.001               |
| Pakistani                            | 5,114 (4.5)   | 1,419 (23.9)        |         | 3.61 (3.23-4.04)                | <0.001  |                      | 3.43 (3.06-3.85)                  | <0.001               |
| Indian                               | 18,590 (16.5) | 4,114 (17.5)        |         | 2.44 (2.24-2.65)                | <0.001  |                      | 1.95 (1.79-2.12)                  | <0.001               |
| Sri Lankan                           | 2,252 (2.0)   | 556 (17.3)          |         | 2.40 (2.06-2.81)                | <0.001  |                      | 1.84 (1.59-2.13)                  | <0.001               |
| Filipino                             | 7,085 (6.3)   | 1,100 (12.1)        |         | 1.59 (1.42-1.77)                | <0.001  |                      | 1.58 (1.41-1.78)                  | <0.001               |
| Sudanese                             | 3,954 (3.5)   | 466 (11.3)          |         | 1.47 (1.25-1.73)                | <0.001  |                      | 1.36 (1.15-1.61)                  | <0.001               |
| Egyptian                             | 9,329 (8.3)   | 1,150 (10.7)        |         | 1.38 (1.23-1.53)                | <0.001  |                      | 1.33 (1.19-1.48)                  | <0.001               |
| Qatari                               | 29,083 (25.8) | 2,129 (7.1)         |         | 0.88 (0.80-0.97)                | 0.008   |                      | 0.95 (0.86-1.04)                  | 0.264                |
| Clinical-care encounter type         |               |                     |         |                                 |         |                      |                                   |                      |
| Emergency                            | 18,473 (16.4) | 3,333 (14.2)        | <0.001  | 1.00                            |         | <0.001               | 1.00                              |                      |
| Inpatient                            | 23,720 (21.0) | 6,308 (19.4)        |         | 1.45 (1.35-1.57)                | <0.001  |                      | 1.17 (1.08-1.27)                  | <0.001               |
| Outpatient                           | 32,146 (28.5) | 5,264 (13.1)        |         | 0.91 (0.85-0.98)                | 0.011   |                      | 0.87 (0.80-0.94)                  | <0.001               |
| Home care/follow-up consultations    | 38,602 (34.2) | 3,939 (9.2)         |         | 0.61 (0.56-0.66)                | <0.001  |                      | 0.70 (0.65-0.76)                  | <0.001               |
| Antibody test date                   |               |                     |         |                                 |         |                      |                                   |                      |
| 16 Jun-30 Jun <sup>e</sup>           | 11,675 (10.3) | 1,919 (11.9)        | <0.001  | 1.00                            |         | <0.001               | 1.00                              |                      |
| 12 May-31 May                        | 716 (0.6)     | 243 (26.2)          |         | 2.62 (2.10-3.27)                | <0.001  |                      | 1.66 (1.34-2.07)                  | <0.001               |
| 01 Jun-15 Jun                        | 2,753 (2.4)   | 704 (18.1)          |         | 1.63 (1.43-1.87)                | <0.001  |                      | 1.50 (1.31-1.73)                  | <0.001               |
| 01 Jul-15 Jul                        | 16,294 (14.4) | 2,555 (13.2)        |         | 1.12 (1.02-1.23)                | 0.021   |                      | 1.21 (1.10-1.34)                  | <0.001               |
| 16 Jul-31 Jul                        | 19,808 (17.5) | 3,249 (13.0)        |         | 1.11 (1.01-1.21)                | 0.034   |                      | 1.21 (1.10-1.34)                  | <0.001               |
| 01 Aug-15 Aug                        | 17,319 (15.3) | 3,136 (14.3)        |         | 1.23 (1.12-1.35)                | <0.001  |                      | 1.24 (1.13-1.37)                  | <0.001               |
| 16-Aug-31 Aug                        | 29,868 (26.4) | 4,759 (13.1)        |         | 1.11 (1.02-1.21)                | 0.018   |                      | 1.35 (1.23-1.48)                  | <0.001               |
| 01 Sep-09 Sep                        | 14,508 (12.8) | 2,279 (13.2)        |         | 1.12 (1.01-1.24)                | 0.030   |                      | 1.41 (1.26-1.57)                  | <0.001               |

AOR, adjusted odds ratio; CI, confidence interval; OR, odds ratio.

<sup>a</sup>Estimates are proportions of antibody-positive persons out of those tested weighted by sex, age, and nationality.

<sup>b</sup>Covariates with p-value  $\leq 0.2$  in the univariable analysis were included in the multivariable analysis.

<sup>c</sup>Covariates with p-value  $\leq 0.05$  in the multivariable analysis were considered strong predictors of anti-SARS-CoV-2 positivity after adjustment for sex, age, nationality, clinical-care encounter type, and antibody test date.

<sup>d</sup>These include other nationalities residing in Qatar.

<sup>e</sup>This category was chosen as a reference given the larger sample size and because of the progressive easing of the social and physical distancing restrictions since June 15, 2020 [21].

**Figure S1.** Trend of SARS-CoV-2 antibody positivity month-by-month. Error bars indicate 95% confidence intervals.

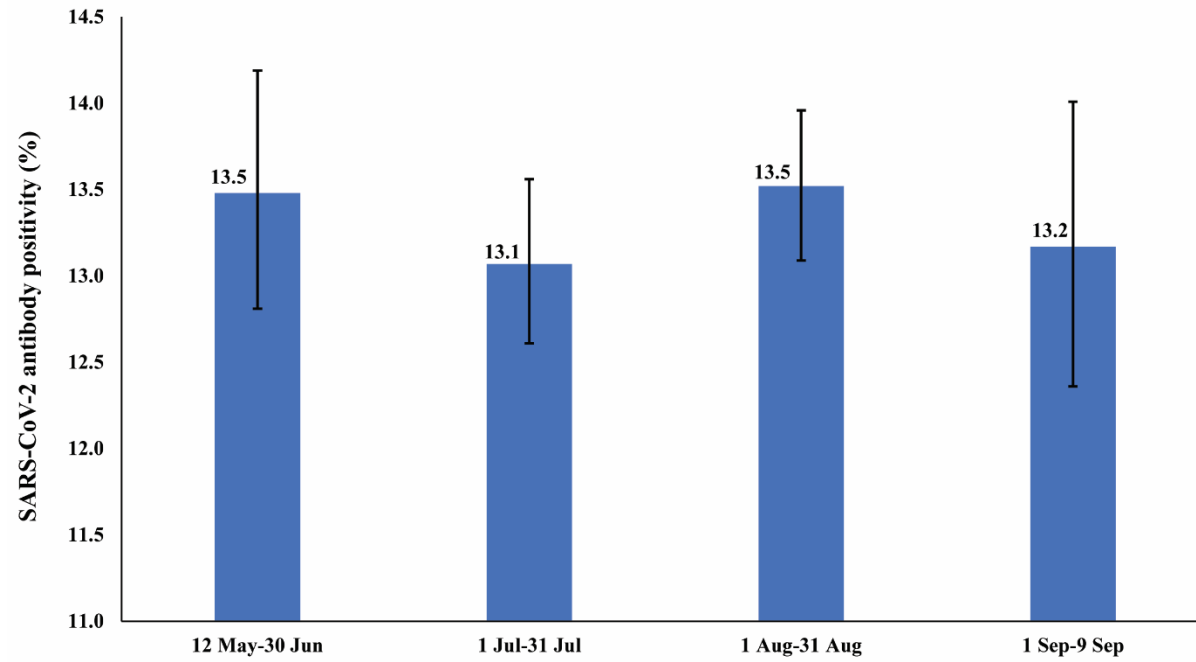

<sup>a</sup>Tests for the months of May and June were combined given the low number of tests in May.

**Table S3.** Associations for having a higher antibody titer (optical density) than the median value ( $\geq 27.0$ ) among 18,844 antibody-positive individuals, where antibody test date has been included as a categorical term.

| Characteristics                      | Tested        | Higher antibody titers than the median |         | Univariable regression analysis |         | F test               | Multivariable regression analysis |                      |        |
|--------------------------------------|---------------|----------------------------------------|---------|---------------------------------|---------|----------------------|-----------------------------------|----------------------|--------|
|                                      | N (%)         | N (% <sup>a</sup> )                    | p-value | OR <sup>a</sup> (95% CI)        | p-value | p-value <sup>b</sup> | AOR <sup>a</sup> (95% CI)         | p-value <sup>c</sup> |        |
| Sex                                  |               |                                        |         |                                 |         |                      |                                   |                      |        |
| Women                                | 4,387 (23.3)  | 2,175 (52.1)                           | 0.702   | 1.00                            | 0.702   | 0.702                | --                                | --                   |        |
| Men                                  | 14,457 (76.7) | 7,244 (51.6)                           |         | 0.98 (0.88-1.09)                |         |                      | --                                | --                   |        |
| Age (years)                          |               |                                        |         |                                 |         |                      |                                   |                      |        |
| 20-29 <sup>d</sup>                   | 2,867 (15.2)  | 1,360 (47.6)                           | <0.001  | 1.00                            | <0.001  | <0.001               | 1.00                              |                      |        |
| <10                                  | 243 (1.3)     | 170 (70.0)                             |         | 2.57 (1.92-3.45)                |         |                      | <0.001                            | 2.94 (2.19-3.96)     | <0.001 |
| 10-19                                | 407 (2.2)     | 210 (54.0)                             |         | 1.30 (1.02-1.65)                |         |                      | 0.036                             | 1.21 (0.92-1.59)     | 0.179  |
| 30-39                                | 5,533 (29.4)  | 2,701 (48.1)                           |         | 1.02 (0.92-1.13)                |         |                      | 0.692                             | 0.99 (0.89-1.10)     | 0.816  |
| 40-49                                | 4,876 (25.9)  | 2,442 (50.1)                           |         | 1.11 (1.00-1.22)                |         |                      | 0.051                             | 1.16 (1.04-1.30)     | 0.007  |
| 50-59                                | 3,220 (17.1)  | 1,634 (50.8)                           |         | 1.14 (1.02-1.27)                |         |                      | 0.020                             | 1.24 (1.10-1.40)     | <0.001 |
| 60-69                                | 1,281 (6.8)   | 700 (54.2)                             |         | 1.31 (1.14-1.50)                |         |                      | <0.001                            | 1.51 (1.30-1.76)     | <0.001 |
| 70-79                                | 315 (1.7)     | 158 (49.7)                             |         | 1.09 (0.86-1.38)                |         |                      | 0.480                             | 1.43 (1.11-1.84)     | 0.005  |
| 80+                                  | 102 (0.5)     | 44 (41.7)                              |         | 0.79 (0.52-1.19)                |         |                      | 0.254                             | 1.30 (0.83-2.02)     | 0.247  |
| Nationality                          |               |                                        |         |                                 |         |                      |                                   |                      |        |
| All other nationalities <sup>e</sup> | 2,203 (11.7)  | 1,064 (51.7)                           | <0.001  | 1.00                            | <0.001  | <0.001               | 1.00                              |                      |        |
| Bangladeshi                          | 3,471 (18.4)  | 1,946 (56.2)                           |         | 1.20 (1.04-1.38)                |         |                      | 0.012                             | 1.69 (1.46-1.95)     | <0.001 |
| Nepalese                             | 2,236 (11.9)  | 1,099 (49.3)                           |         | 0.91 (0.78-1.06)                |         |                      | 0.210                             | 1.54 (1.32-1.81)     | <0.001 |
| Filipino                             | 1,100 (5.8)   | 507 (46.2)                             |         | 0.80 (0.65-0.99)                |         |                      | 0.038                             | 1.31 (1.05-1.62)     | 0.016  |
| Indian                               | 4,114 (21.8)  | 2,027 (51.0)                           |         | 0.97 (0.84-1.13)                |         |                      | 0.699                             | 1.23 (1.05-1.43)     | 0.010  |
| Pakistani                            | 1,419 (7.5)   | 731 (55.5)                             |         | 1.16 (0.96-1.41)                |         |                      | 0.124                             | 1.19 (0.98-1.44)     | 0.077  |
| Sri Lankan                           | 556 (3.0)     | 242 (45.2)                             |         | 0.77 (0.59-0.99)                |         |                      | 0.044                             | 1.11 (0.87-1.43)     | 0.395  |
| Sudanese                             | 466 (2.5)     | 264 (53.2)                             |         | 1.06 (0.78-1.44)                |         |                      | 0.712                             | 1.04 (0.77-1.40)     | 0.802  |
| Egyptian                             | 1,150 (6.1)   | 535 (49.0)                             |         | 0.90 (0.73-1.10)                |         |                      | 0.283                             | 0.83 (0.68-1.01)     | 0.068  |
| Qatari                               | 2,129 (11.3)  | 1,004 (51.8)                           |         | 1.00 (0.84-1.21)                |         |                      | 0.959                             | 0.80 (0.66-0.96)     | 0.018  |
| Clinical-care encounter type         |               |                                        |         |                                 |         |                      |                                   |                      |        |
| Emergency                            | 3,333 (17.7)  | 1,866 (58.5)                           | <0.001  | 1.00                            | <0.001  | <0.001               | 1.00                              |                      |        |
| Outpatient                           | 5,264 (27.9)  | 3,189 (60.7)                           |         | 1.10 (0.97-1.25)                |         |                      | 0.136                             | 1.11 (0.98-1.26)     | 0.113  |
| Home care/follow-up consultations    | 3,939 (20.9)  | 2,195 (58.3)                           |         | 0.99 (0.86-1.14)                |         |                      | 0.915                             | 1.03 (0.90-1.19)     | 0.628  |
| Inpatient                            | 6,308 (33.5)  | 2,169 (35.2)                           |         | 0.39 (0.34-0.44)                |         |                      | <0.001                            | 0.39 (0.34-0.45)     | <0.001 |
| Antibody test date                   |               |                                        |         |                                 |         |                      |                                   |                      |        |
| 12 May-30 Jun                        | 2,866 (15.2)  | 846 (31.1)                             | <0.001  | 1.00                            | <0.001  | <0.001               | 1.00                              |                      |        |
| 01 Jul-15 Jul                        | 2,555 (13.6)  | 1,190 (46.2)                           |         | 1.91 (1.62-2.24)                |         |                      | <0.001                            | 1.83 (1.53-2.18)     | <0.001 |
| 16 Jul-31 Jul                        | 3,249 (17.2)  | 1,649 (52.4)                           |         | 2.44 (2.09-2.85)                |         |                      | <0.001                            | 2.22 (1.88-2.63)     | <0.001 |
| 01 Aug-15 Aug                        | 3,136 (16.6)  | 1,745 (56.0)                           |         | 2.82 (2.41-3.29)                |         |                      | <0.001                            | 2.51 (2.13-2.96)     | <0.001 |

|               |              |               |                  |        |                  |        |
|---------------|--------------|---------------|------------------|--------|------------------|--------|
| 16-Aug-31 Aug | 4,759 (25.3) | 2,719 (58.6)  | 3.14 (2.72-3.62) | <0.001 | 2.68 (2.29-3.13) | <0.001 |
| 01 Sep-09 Sep | 2,279 (12.1) | 1,270 ((58.3) | 3.10 (2.60-3.68) | <0.001 | 2.52 (2.10-3.03) | <0.001 |

AOR, adjusted odds ratio; CI, confidence interval; OR, odds ratio.

<sup>a</sup>Estimates are proportions of persons with antibody titers higher than the median among those antibody-positive, weighted by sex, age, and nationality.

<sup>b</sup>Covariates with p-value  $\leq 0.2$  in the univariable analysis were included in the multivariable analysis.

<sup>c</sup>Covariates with p-value  $\leq 0.05$  in the multivariable analysis were considered strong predictors of anti-SARS-CoV-2 positivity after adjustment for age, nationality, clinical-care encounter type, and antibody test date.

<sup>d</sup>The 20-29 age group was chosen as the reference group (instead of the <10 age group) because of the larger sample size and for epidemiological relevance.

<sup>e</sup>These include other nationalities residing in Qatar.
